# Supplementary material
Source: PubMed Central journal article supplement (PMC5762855)
Supplement: cdd2017182x1.pdf [file cdd2017182x1.pdf]

## **SUPPLEMENTARY INFORMATION**

### **Lin28B and miR-142-3p regulate neuronal differentiation by modulating Staufen1 expression**

Younseo Oh, Jungyun Park, Jin-Il Kim, Mi-Yoon Chang, Sang-Hun Lee, Youl-Hee Cho and Jungwook Hwang

Running title: STAU1 expression in neuronal differentiation

## SUPPLEMENTARY FIGURE LEGENDS

**Supplementary Figure S1.** Change in STAU1 expression during differentiation also affects neuronal differentiation. **(a)** Schematic representation of the experiments. Differentiation was induced in SH-SY5Y cells by retinoic acid. **(b)** At day 3 of differentiation, cells were transiently transfected with siRNAs (siControl or siSTAU1) and then kept under differentiation conditions for an additional 4 days. Western blot was performed to detect the indicated proteins. **(c)** Depletion of UPF1 reduced neuronal differentiation. SH-SY5Y cells were transfected with siControl or siUPF1 to decrease the expression of UPF1 and then differentiated. The expression of specified proteins on the indicated incubation day was detected by Western blot.

**Supplementary Figure S2.** Conserved sequences in the 3'UTR of STAU1 and the predicted RNA secondary structures. **(a)** miR-142-3p binding sites in the 3'UTR of STAU1 were conserved among mammals. **(b)** The secondary structures of WT or mutated pre-miR-142 (predicted using the mFold web server) and the changes in free energy by loss of "GG" and mutation of "A" to "G" in normal pre-miR-142.  $\Delta G$ , Gibbs free energy.

**Supplementary Figure S3.** Depletion or overexpression of STAU1 or Lin28B did not affect cell proliferation. SH-SY5Y cells that were transiently transfected with STAU1<sup>55</sup>-HA<sub>3</sub> **(a)** or FLAG-Lin28B **(b)** proliferated for 5 days. Protein expression was analyzed by Western blot (left panel), and the number of cells in a 35-mm dish were counted at the indicated day (right panel). Western blot and cell counting were also performed with STAU1- **(c)** and Lin28B-depleted cells **(d)**. Cell numbers were obtained by counting cells by using a hemocytometer on the indicated days. \*\*,  $p < 0.01$ .

**SUPPLEMENTARY TABLE**

**Supplementary Table S2. List of transcripts upregulated upon UPF1 and STAU1 depletion and differentiation (categorized to “anatomical structure formation involved in morphogenesis”).**

| Gene name | NCBI reference | Description                          | Fold change       |                    |                                |
|-----------|----------------|--------------------------------------|-------------------|--------------------|--------------------------------|
|           |                |                                      | siUPF1 /siControl | siSTAU1 /siControl | Differentiation /proliferation |
| CD36      | NM_001001547   | CD36 molecule                        | 59.20             | 11.40              | 2.83                           |
| PERP      | NM_022121      | PERP, TP53 apoptosis effector        | 3.40              | 15.20              | 2.40                           |
| RAB17     | NM_022449      | RAB17, member RAS oncogene family    | 4.60              | 7.60               | 68.00                          |
| TBX5      | NM_080171      | T-box 5                              | 7.20              | 7.60               | 7.00                           |
| TBC1D30   | XM_037557      | TBC1 domain family, member 30        | 3.40              | 10.00              | 7.00                           |
| ANGPTL4   | NM_139314      | angiopoietin-like 4                  | 3.14              | 2.31               | 148.40                         |
| ANGPTL6   | NM_031917      | angiopoietin-like 6                  | 4.60              | 2.40               | 2.76                           |
| COL4A3    | NM_000091      | collagen, type IV, alpha 3           | 2.40              | 3.60               | 6.00                           |
| EPAS1     | NM_001430      | endothelial PAS domain protein 1     | 2.69              | 2.31               | 7.17                           |
| FAP       | NM_001291807   | fibroblast activation protein, alpha | 2.40              | 4.80               | 26.80                          |
| HOXA1     | NM_005522      | homeobox A1                          | 2.40              | 4.80               | 10.60                          |
| ITGA3     | NM_005501      | integrin, alpha 3                    | 2.40              | 17.80              | 3.95                           |
| KRT8      | NM_002273      | keratin 8                            | 3.35              | 32.92              | 5.45                           |
| MEGF11    | NM_032445      | multiple EGF-like -domains 11        | 2.40              | 6.00               | 2.80                           |
| NGFR      | NM_002507      | nerve growth factor receptor         | 2.40              | 6.00               | 8.83                           |
| PTK2B     | NM_004103      | PTK2B protein tyrosine kinase 2 beta | 35.20             | 20.40              | 2.12                           |
| RS1       | NM_000330      | retinoschisin 1                      | 2.48              | 4.57               | 2.33                           |
| THBS2     | NM_003247      | thrombospondin 2                     | 8.00              | 4.00               | 4.22                           |
| TMEM100   | NM_018286      | transmembrane protein 100            | 7.20              | 2.40               | 2.09                           |

**Supplementary Table S3. Sequences used in this study**

| RT-qPCR primer sequences |                                  |
|--------------------------|----------------------------------|
| Primer name              | Sequence                         |
| STAU1-F                  | 5'- TCAATCCGATTAGCCGACTG -3'     |
| STAU1-R                  | 5'- TCTTTATGGGTGTCTTCTCCTCTG -3' |
| FLuc-F                   | 5'- CCCCATCTTCGGCAACCAG -3'      |
| FLuc-R                   | 5'- GCGCAAGAATAGCTCCTCC -3'      |
| RLuc-F                   | 5'- GTGGGCCACGACTGGGGGGC -3'     |
| RLuc-R                   | 5'- ACCATTTTCTCGCCCTCTTCGC -3'   |
| Synaptophysin-F          | 5'- CAACACCTCGGTGGTGTTCG -3'     |
| Synaptophysin-R          | 5'- CCTGAGGCCCGTAGGAATC -3'      |
| Nestin-F                 | 5'- CGCACCTCAAGATGTCCCTC -3'     |
| Nestin-R                 | 5'- CAGCTTGGGGTCCTGAAAGC -3'     |
| HMGA2-F                  | 5'- CTGCTATACACAAGCAATGCAAG -3'  |
| HMGA2-R                  | 5'- GTAAGGAGATTGCTTCTTTAACTG -3' |
| U6-F                     | 5'- TCGCTTCGGCAGCACATATAC -3'    |
| U6-R                     | 5'- TCGTGTGCATCCTTGCGCAG -3'     |
| pri-miR-142-3p-F         | 5'- CGGACTTCTCATGTCCGG -3'       |
| pri-miR-142-3p-R         | 5'- CGTCGTCACCGCACTA -3'         |
| pri-let-7a-F             | 5'- CCTGGATGTTCTTCTTCACTG -3'    |
| pri-let-7a-R             | 5'- GCCTGGATGCAGACTTTTCT -3'     |
| pri-miR-16-F             | 5'- GTCAGCAGTGCCTTAGCAGC -3'     |
| pri-miR-16-R             | 5'- GTCAACCTTACTTCAGCAGC -3'     |
| pre-miR-142-F            | 5'-GACAGTGCAGTCA-3'              |
| pre-miR-142-R            | 5'-CTCATCCATAAAG-3'              |
| pre-let-7a-F             | 5'-TGGGATGAGGTAGTAGG-3'          |
| pre-let-7a-R             | 5'-TAGGAAAGACAGTAGATTG-3'        |
| mSTAU1-F                 | 5'-TGCGCTGAAGCGGAATTTGC-3'       |
| mSTAU1-R                 | 5'-CCCTTGCCGCATTCTTCTTGGAG-3'    |
| mLin28B-F                | 5'-GCACATGGTGGCCAACTG-3'         |

|           |                                 |
|-----------|---------------------------------|
| mLin28B-R | 5'-GCTGCAAATGCTTTCGTGGC-3'      |
| mLin28A-F | 5'-CTTTGTGCACCAGAGCAAGC-3'      |
| mLin28A-R | 5'-TAAAGGTGAACTCCACCGCC-3'      |
| mNestin-F | 5'-GGAGTGTGCTTAGAGGT-3'         |
| mNestin-R | 5'-TCCAGAAAGCCAAGAGAA-3'        |
| mGAPDH-F  | 5'-CTCATGACCACAGTCCATGC-3'      |
| mGAPDH-R  | 5'-TTCAGCTCTGGGATGACCTT-3'      |
| ARHGDIB-F | 5'-CAGAAGTCCCTGAAAGAGCTG-3'     |
| ARHGDIB-R | 5'-GGCTTCCAGATCTCCAGTAAG-3'     |
| DACT1-F   | 5'-TCTTGGAGGAGAACATCTTGC-3'     |
| DACT1-R   | 5'-TCACTCAGCTCATAAAACCCTG-3'    |
| HPSE-F    | 5'-TGGTTAGGAGAAACAAGCTCTG-3'    |
| HPSE-R    | 5'-ACCACTTCTATTCCCATTTCGG-3'    |
| KCNG1-F   | 5'-CGGGAACCTGAGGCCCGA-3'        |
| KCNG1-R   | 5'-TAGAACGCGCCCTTGATGG-3'       |
| DEPDC4-F  | 5'-GAACCGTAGAGATGGCTTCTG-3'     |
| DEPDC4-R  | 5'-ACTTAAGACCACATCGACAGC-3'     |
| COL5A1-F  | 5'-CAGATGGTGAATACTGGGTCG-3'     |
| COL5A1-R  | 5'-CACATAGGAGAGCAGTTTCCC-3'     |
| PPARG-F   | 5'-TTGAATGTCGTGTCTGTGGAG-3'     |
| PPARG-R   | 5'-CAAGGCATTTCTGAAACCGAC-3'     |
| B3GAT1-F  | 5'-AGAACTTGTCACCCTCAACG-3'      |
| B3GAT1-R  | 5'-TTCTTGCCCTCATTACCAG-3'       |
| FBXO4-F   | 5'-GGAAAGAGATAGAGCAAGGGAAG-3'   |
| FBXO4-R   | 5'-GAAAATTCATCTTGCCATTCATGTC-3' |
| ERN1-F    | 5'-TCCTCATATCCATGCCCAATG-3'     |
| ERN1-R    | 5'-AGAAAAGATGTCCACCGTGTAG-3'    |
| PTHLH-F   | 5'-GTGTCCCCTAACTCCAAGCC-3'      |
| PTHLH-R   | 5'-TTGAGCGGCTGCTCTTTGTA-3'      |
| DLX2-F    | 5'-CCTTACTCCGCCAAGAGCAG-3'      |
| DLX2-R    | 5'-CTCCTTCTCAGGCTCGTTGTT-3'     |

|          |                              |
|----------|------------------------------|
| ULK2-F   | 5'-CGGATGACTTTGTTTTGGTGC-3'  |
| ULK2-R   | 5'-AGGAACTGGAATTGGTGCTG-3'   |
| CELF2-F  | 5'-GCATGAAACGCTTGAAGGTG-3'   |
| CELF2-R  | 5'-AGAAACAATGACGGGACGATG-3'  |
| KLRG2-F  | 5'-TGTCATTGTGGTCCTGGC-3'     |
| KLRG2-R  | 5'-GTCCTGGGTGTGGCTTAG-3'     |
| THBS2-F  | 5'-GACAACTGCCCCTACATCTC-3'   |
| THBS2-R  | 5'-ACAAATATCACCCCGTCCATC-3'  |
| NGFR-F   | 5'-CCTGTCTATTGCTCCATCCTG-3'  |
| NGFR-R   | 5'-CTGGTCATGCAGGCTCTG-3'     |
| NRG2-F   | 5'-CACTCCTGTTCTCCTTCTCAC-3'  |
| NRG2-R   | 5'-CAGAAGTCAGGCTCTCAGAAC-3'  |
| PTK2B-F  | 5'-CTAGGAAAGATGGTGAGAAGCG-3' |
| PTK2B-R  | 5'-ATTCAGGACCACATCTTCACG-3'  |
| STAT4-F  | 5'-GACATTCCCAAAGACAAAGCC-3'  |
| STAT4-R  | 5'-CTCTCAACACCGCATAACA-3'    |
| PPARG-F  | 5'-TTGAATGTCGTGTCTGTGGAG-3'  |
| PPARG-R  | 5'-CAAGGCATTTCTGAAACCGAC-3'  |
| NPNT-F   | 5'-CGGCAACCTTCAAATGACTTG-3'  |
| NPNT-R   | 5'-TGTCAGATATTGTCCACCTGC-3'  |
| ADIPOQ-F | 5'-TGCAGTCTGTGGTTCTGATTC-3'  |
| ADIPOQ-R | 5'-TCGTGGTTTCCTGGTCATG-3'    |
| CD36-F   | 5'-CAGCCTCATTTCACCTTTTG-3'   |
| CD36-R   | 5'-TGTCTGGGTTTTCAACTGGAG-3'  |
| PERP-F   | 5'-GGTGATCTGTTTCATCCTCTCC-3' |
| PERP-R   | 5'-CCGTAGGCCCAGTTATAGATG-3'  |
| c-Jun-F  | 5'-CTTGAAAGCTCAGAACTCGG-3'   |
| c-Jun-R  | 5'-TCAGCCCCCGACGGTCTCTC-3'   |
| IL7R-F   | 5'-GCTCAAAATGGAGACTTGGAAG-3' |
| IL7R-R   | 5'-CGAGGGCCCCACATATTC-3'     |
| ZNF75D-F | 5'-GACCCACTACCATCTTCCAAG-3'  |

|          |                             |
|----------|-----------------------------|
| ZNF75D-R | 5'-GTTCCCTCATTTCGATCCCTC-3' |
| LACZ-F   | 5'-GTACGTCTTCCCGAGCGAAA-3'  |
| LACZ-R   | 5'-CTGTTGACTGTAGCGGCTGA-3'  |
| GAPDH    | 5'-CTGTGGTCATGAGTCCTTCC-3'  |
| GAPDH    | 5'-CAAGATCATCAGCAATGCC-3'   |

#### RT-sqPCR primer sequences

| Primer name  | Sequence                           |
|--------------|------------------------------------|
| miR-142-3p-F | 5'- CGCTGTAGTGTTTCCTACTTTATGGA -3' |
| let-7a-F     | 5'- GCCGATGAGGTAGTAGGTTG -3'       |
| miR-16-F     | 5'- CGCTAGCAGCACGTAAATATTGGCG -3'  |

#### siRNA sequences

|            |                                         |
|------------|-----------------------------------------|
| siSTAU1    | 5'- CAGAGAGGCUGGAGGUGAA(dTdT) -3'       |
| siLin28B-1 | 5'- CTGGGATAACATAACTCCAGA(dTdT) -3'     |
| siLin28B-2 | 5'- AACATGATAAGCGTTGCTCAA(dTdT) -3'     |
| siUPF1-1   | 5'- GAUGCAGUUCGCUCCAUU(dTdT) -3'        |
| siUPF1-2   | 5'- GCTTAGTCCATCAGCATCTTATTCT(dTdT) -3' |

#### mimic miRNA sequences

|            |                                 |
|------------|---------------------------------|
| miR-142-3p | 5'- UGUAGUGUUUCCUACUUUAUGGA -3' |
| miR-142-5p | 5'- CAUAAAGUAGAAAGCACUACUUU -3' |

#### Cloning primer sequences

| Primer name  | Sequence                                         | Reference                                                     |
|--------------|--------------------------------------------------|---------------------------------------------------------------|
| STAU1_XhoI-F | 5'- <u>CGCCTCGAGATGAAACTT</u><br>GGAAAAAACCA -3' | underlined sequence represents<br>the <i>XhoI</i> enzyme site |
| STAU1_XhoI-R | 5'- GCGCTCGAGTACTATAG<br>AATAGGGCCCTC -3'        |                                                               |

|                               |                                                                                   |                                                                |
|-------------------------------|-----------------------------------------------------------------------------------|----------------------------------------------------------------|
| STAU1_3'UTR-XbaI-R            | 5'- GCGTCTAGATTAACAGTA<br>TCGAGCA -3'                                             | underlined sequence represents<br>the <i>XbaI</i> enzyme site  |
| STAU1_3'UTR-XbaI-F            | 5'- GCGTCTAGATATTAATAAAA<br>ACATTGTGTAT -3'                                       |                                                                |
| STAU1_3'UTR_<br>middle-WT     | 5'- GACTTAGCTTTCACT <u>ACACTA</u><br><u>CAGGATATGATCTCCATGTAG</u><br>TCCATATA -3' | underlined sequence represents<br>the 142-3p target site       |
| STAU1_3'UTR_<br>middle-Mutant | 5'- GACTTAGCTTTCACT <u>AGT</u><br><u>GAACAGGATATGATCTCCATG</u><br>TAGTCCATATA -3' | underlined sequence represents<br>the 142-3p target site       |
| STAU1_3'UTR-5'                | 5'- TAGTGAAAGCTAAGTCCT<br>CAAGAGCCATATGTATAGATA<br>CACAATGTTTTTTAATA -3'          |                                                                |
| STAU1_3'UTR-3'                | 5'- TTAACAGTATCGAGCACT<br>CTGGAAAATCACTCTGCAGGT<br>TTATATGGACTACATGGAGAT -3'      |                                                                |
| Pre-miR-142_BamHI-F-WT        | 5'- GCGGGATCCGCAGTCACC<br>CATAAAGTAGAAAGCACTACT<br>AACAGCACTGGAGGGTGT -3'         | underlined sequence represents<br>the <i>BamHI</i> enzyme site |
| Pre-miR-142_XhoI-R-WT         | 5'-GCGCTCGAGGTACACTCA<br>TCCATAAAGTAGGAAACACTA<br>CACCTCCAGTGCTGTTA -3'           | underlined sequence represents<br>the <i>XhoI</i> enzyme site  |
| Pre-miR-142_BamHI-F-Mut       | 5'-GCGGGATCCGCAGTCACC<br>CATAAAGTAGGAAGCACTACTA<br>ACAGCACTAGGGTGT-3'             | underlined sequence represents<br>the <i>BamHI</i> enzyme site |
| Pre-miR-142_XhoI-R-Mut        | 5'-GCGCTCGAGGTACACTC<br>ATCCATAAAGTAGGAAACACTA<br>CACCTAGTGCTGTTA-3'              | underlined sequence represents<br>the <i>XhoI</i> enzyme site  |
