# Supplementary material
Source: PubMed Central journal article supplement (PMC5762855)

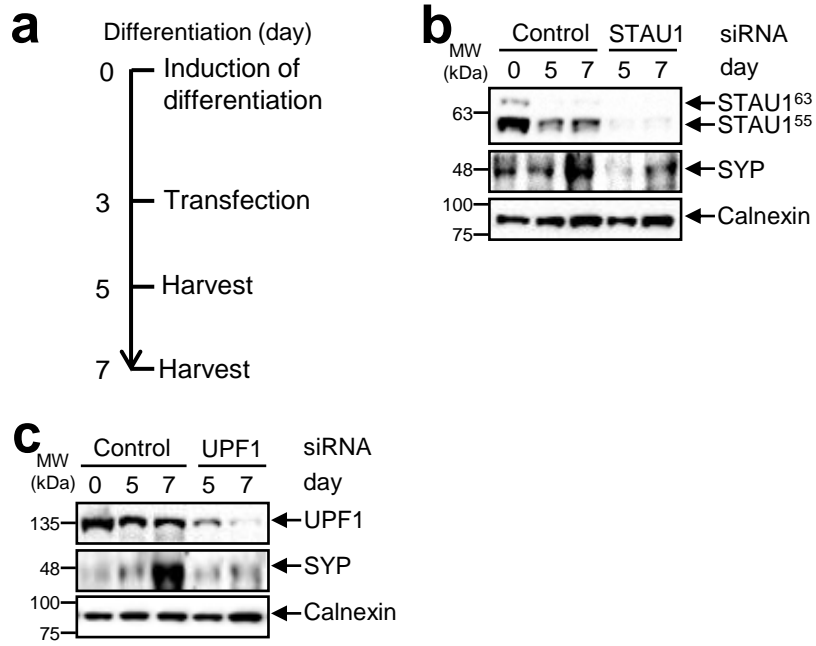

**a**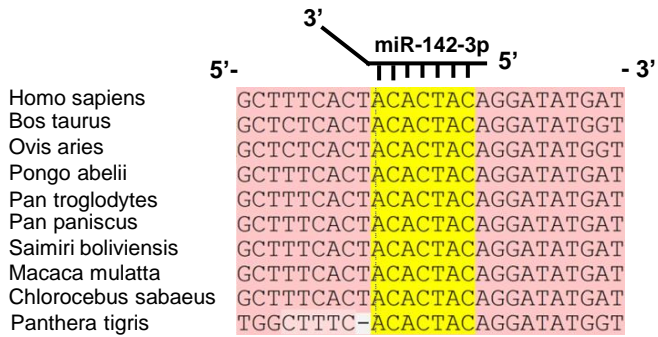**b**

Structure of pre-miR-142-WT

Structure of pre-miR-142-Mut

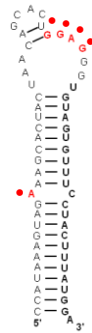 $\Delta G = -44.30$  kcal/mol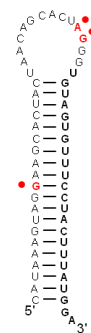 $\Delta G = -50.60$  kcal/mol

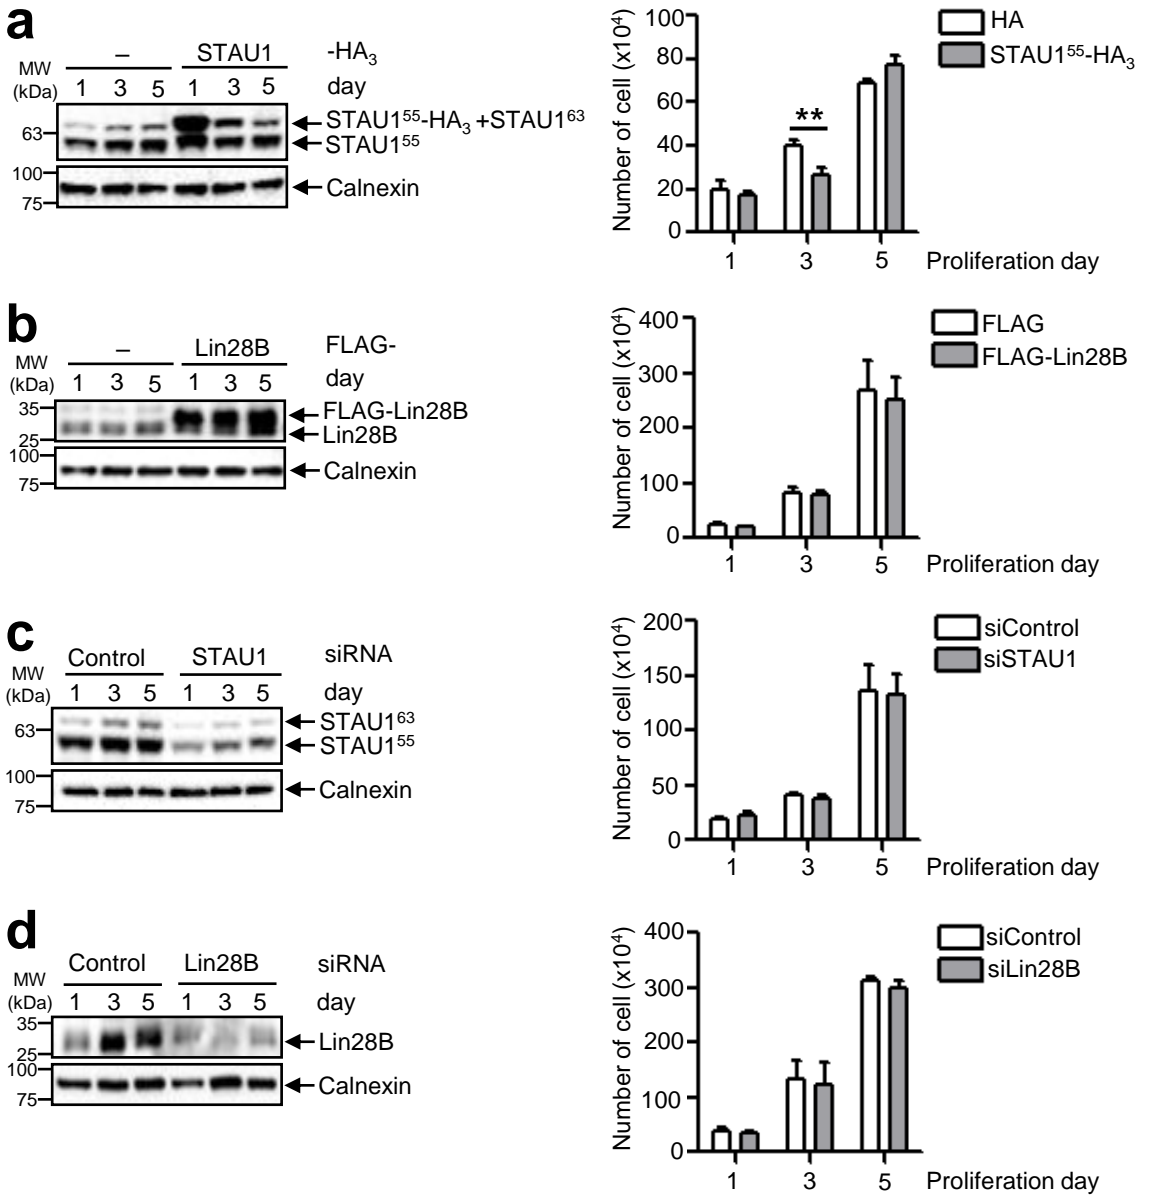

Supplement: cdd2017182x2.pdf [file cdd2017182x2.pdf]
